# Supplementary material
Source: PubMed Central journal article supplement (PMC4402146)
Supplement: NIHMS677749-supplement-Supplemental.pdf [file NIHMS677749-supplement-Supplemental.pdf]

Supplementary Figure 1. Site of Case Recruitment

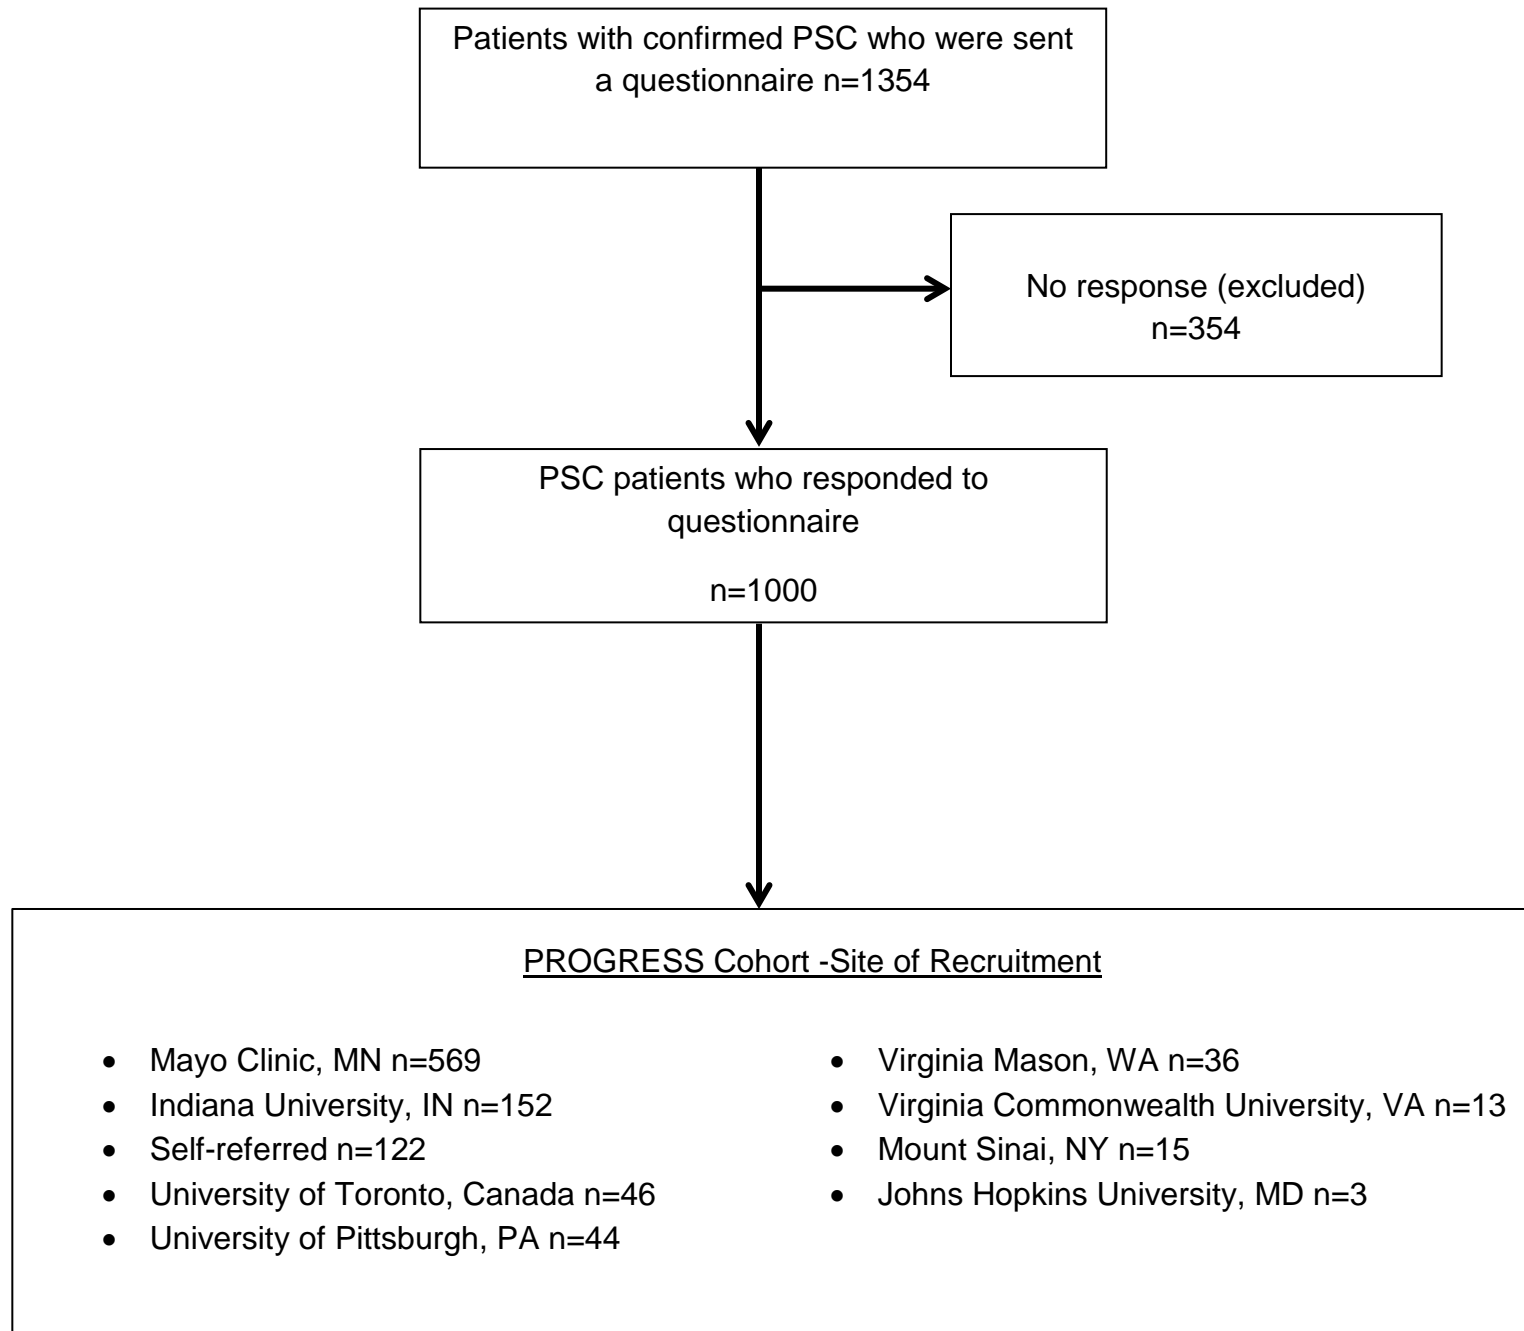

Abbreviations: PSC (primary sclerosing cholangitis); PROGRESS: PSC Resource of Genetic Risk, Environment and Synergy Studies).

Supplementary Table 1. Comorbidities, Chewing Tobacco & Second Hand Smoke Exposure Reported Among Cases and Controls<sup>1</sup>

|                                       | <b>Controls<br/>(n=663)</b> | <b>Cases (PSC)<br/>(n=1000)</b> | <b>P-value</b> |
|---------------------------------------|-----------------------------|---------------------------------|----------------|
| <b>Lupus</b>                          | 0%                          | 0%                              | -              |
| <b>Scleroderma</b>                    | 0%                          | 0%                              | -              |
| <b>Multiple Sclerosis</b>             | 0%                          | 0%                              | -              |
| <b>Polymyositis</b>                   | 0%                          | 0%                              | -              |
| <b>Vitiligo</b>                       | 1%                          | 0%                              | 0.10           |
| <b>Sarcoidosis</b>                    | 0%                          | 0%                              | -              |
| <b>Rheumatoid Arthritis</b>           | 2%                          | 3%                              | 0.58           |
| <b>Sjogrens Syndrome</b>              | 0%                          | 1%                              | 0.67           |
| <b>Raynaud's disease</b>              | 3%                          | 2%                              | 0.50           |
| <b>Chewing Tobacco Use (ever)</b>     | 7%                          | 5%                              | 0.59           |
| <b>Age Started Chewing Tobacco</b>    | 20.0 (14.0-17.0)            | 19.5 (18.0-25.0)                | 0.53           |
| <b>Average Use of Chewing Tobacco</b> |                             |                                 | 0.29           |
| Once a Month or Less                  | 25%                         | 2%                              |                |
| Several Times Per Month               | 21%                         | 16%                             |                |

---

|                                                    |               |               |      |
|----------------------------------------------------|---------------|---------------|------|
| Several Times Per Week                             | 15%           | 24%           |      |
| Daily                                              | 39%           | 58%           |      |
| <b>Ever Lived with a Smoker</b>                    | 63%           | 58%           | 0.78 |
| <b>Hours Per Day Exposed to Smoke<br/>in House</b> | 4.0 (2.0-8.0) | 4.0 (2.0-8.0) | 0.34 |
| <b>Yrs Lived with a Smoker</b>                     |               |               | 0.78 |
| Less than 1 yr                                     | 1%            | 2%            |      |
| 1-5 yrs                                            | 12%           | 9%            |      |
| 6-10 yrs                                           | 12%           | 9%            |      |
| More than 11 yrs                                   | 75%           | 77%           |      |
| <b>Ever Worked with a Smoker</b>                   | 53%           | 48%           | 0.34 |
| <b>Hours per Day Exposed to Smoke<br/>at Work</b>  | 4.0 (1.0-8.0) | 4.0 (1.0-8.0) | 0.64 |
| <b>Yrs Worked with a Smoker</b>                    |               |               | 0.46 |
| Less than 1 yr                                     | 3%            | 7%            |      |
| 1-5 yrs                                            | 37%           | 35%           |      |

---

---

|                  |     |     |
|------------------|-----|-----|
| 6-10 yrs         | 22% | 21% |
| More than 11 yrs | 38% | 37% |

---

<sup>1</sup> Control values are age- and gender-adjusted to the distribution of the cases. Therefore, the number of subjects is not reported. The P-value is derived from the logistic regression model adjusting for age and gender.

Abbreviations: PSC (primary sclerosing cholangitis); yrs (years).

Supplementary Table 2. Sensitivity Analysis Excluding those Younger than 21 years<sup>1</sup>

|                                                    | <b>OR (95% CI), P-value</b><br><b>PSC-IBD vs. Controls</b> | <b>OR (95% CI), P-value</b><br><b>PSC-woIBD vs. Controls</b> |
|----------------------------------------------------|------------------------------------------------------------|--------------------------------------------------------------|
| <b>Smoked Cigarettes (ever)</b>                    | 0.5 (0.4-0.7) p<.001                                       | 0.9 (0.7-1.3) p=0.55                                         |
| <b>Currently Smoke Cigarettes</b>                  | 0.5 (0.1-1.0) p=0.06                                       | 1.3 (0.5-3.1) p=0.56                                         |
| <b>Pack Yrs</b>                                    | 0.8 (0.7-0.96) p=0.01                                      | 1.0 (0.8-1.1) p=0.61                                         |
| <b>Appendix Removal</b>                            | 1.7 (1.3-2.3) p<.001                                       | 1.1 (0.8-1.6) p=0.51                                         |
| <b>Tonsillectomy</b>                               | 0.8 (0.6-1.1) p=0.14                                       | 1.0 (0.7, 1.4) p=0.92                                        |
| <b>Tonsillectomy as Child (0-19 Years)</b>         | 0.9 (0.7-1.2) p=0.70                                       | 1.1 (0.8-1.6) p=0.53                                         |
| <b>Recurring UTIs</b>                              | 1.6 (1.1-2.3) p=0.03                                       | 1.9 (1.2-3.) p<0.01                                          |
| <b>Frequency of Recurring UTI</b>                  | 1.2 (0.8-1.7) p=0.47                                       | 1.1 (0.7-1.8) p=0.73                                         |
| <b>Hormone Based Contraceptive Use (ever)</b>      | 0.7 (0.5-1.1) p=0.10                                       | 0.9 (0.5-1.6) p=0.74                                         |
| <b>HRT use (ever)</b>                              | 0.6 (0.4-0.8) p<0.01                                       | 0.5 (0.3-0.8) p<0.01                                         |
| <b>Freq Steak or Burger (fastfood or panfried)</b> | 1.3 (1.1-1.6) p<0.01                                       | 1.1 (0.9-1.4) p=0.41                                         |

|                                            | <b>OR (95% CI), P-value<br/>PSC-IBD vs. Controls</b> | <b>OR (95% CI), P-value<br/>PSC-woIBD vs. Controls</b> |
|--------------------------------------------|------------------------------------------------------|--------------------------------------------------------|
| <b>Freq Steak/Burger (grilled)</b>         | 0.9 (0.8-0.96) p<0.01                                | 0.9 (0.8-0.98) p=0.02                                  |
| <b>Steak or Burgers (how well done)</b>    | 1.3 (1.2-1.5) p<.001                                 | 1.2 (1.1-1.4) p<0.01                                   |
| <b>Freq Chicken (fastfood or panfried)</b> | 1.2 (1.0-1.6) p=0.06                                 | 1.4 (1.01-1.8) p=0.04                                  |
| <b>Freq Chicken (grilled)</b>              | 0.8 (0.8-0.9) p<.001                                 | 0.9 (0.8-1.3) p=0.11                                   |
| <b>Freq Grilled/Barbequed Meat (C-S-B)</b> | 0.8 (0.7- 0.9) p<.001                                | 0.8(0.7-0.97) p=0.02                                   |
| <b>Freq Fastfood/Panfried (C-S-B)</b>      | 1.4(1.1-1.8) p<0.01                                  | 1.3(1.0-1.8) p=0.09                                    |
| <b>Eat Fish (yes/no)</b>                   | 0.4 (0.2-0.6) p<.001                                 | 0.5 (0.3-0.9) p=0.02                                   |
| <b>Freq Fish (any method)</b>              | 0.4 (0.3-0.6) p<.001                                 | 0.7(0.4-1.2) p=0.26                                    |
| <b>Freq Vegetables</b>                     | 0.9 (0.8-0.9) p<.001                                 | 0.9 (0.9-0.99) p=0.04                                  |
| <b>Freq Fruit</b>                          | 0.9 (0.8-0.9) p<.001                                 | 1.0 (0.9-1.0) p=0.52                                   |
| <b>Freq Milk</b>                           | 1.0 (0.9-1.0) p=0.07                                 | 0.9 (0.9- 0.97) p<0.01                                 |

<sup>1</sup>Control values are age- and gender-adjusted to the distribution of the cases. Therefore, the number of subjects is not reported. The P-value is derived from the logistic regression model adjusting for age and gender.

Controls n=652; PSC-IBD n=693; PSC-wolBD n=251

Abbreviations: IBD (inflammatory bowel disease); PSC (primary sclerosing cholangitis); PSC-IBD (PSC with IBD); PSC-wolBD (PSC without IBD); odds ratio (OR); CI (confidence interval); hormone replacement therapy (HRT); years (yrs); urinary tract infections (UTI's);freq (frequency); C-S-B (chicken-steak-burger).

Supplementary Table 3. Sensitivity Analysis Excluding Self-Reported Diagnosis of Primary Sclerosing Cholangitis<sup>1</sup>

|                                               | <b>OR (95% CI), P-value</b><br><b>PSC-IBD vs. Controls</b> | <b>OR (95% CI), P-value</b><br><b>PSC-woIBD vs. Controls</b> |
|-----------------------------------------------|------------------------------------------------------------|--------------------------------------------------------------|
| <b>Smoked Cigarettes (ever)</b>               | 0.5 (0.4-0.7) p<.001                                       | 0.9 (0.7-1.3) p=0.55                                         |
| <b>Currently Smoke Cigarettes</b>             | 0.5 (0.1-1.0) p=0.06                                       | 1.3 (0.5-3.1) p=0.56                                         |
| <b>Pack Yrs</b>                               | 0.8 (0.7-0.96) p=0.01                                      | 1.0 (0.8-1.1) p=0.61                                         |
| <b>Appendix Removal</b>                       | 1.7 (1.3-2.3) p<.001                                       | 1.1 (0.8-1.6) p=0.51                                         |
| <b>Tonsillectomy</b>                          | 0.8 (0.6-1.1) p=0.14                                       | 1.0 (0.7, 1.4) p=0.92                                        |
| <b>Tonsillectomy as Child (0-19 Years)</b>    | 0.9 (0.7-1.2) p=0.70                                       | 1.1 (0.8-1.6) p=0.53                                         |
| <b>Recurring UTIs</b>                         | 1.6 (1.1-2.3) p=0.03                                       | 1.9 (1.2-3.) p<0.01                                          |
| <b>Frequency of Recurring UTI</b>             | 1.2 (0.8-1.7) p=0.47                                       | 1.1 (0.7-1.8) p=0.73                                         |
| <b>Hormone Based Contraceptive Use (ever)</b> | 0.7 (0.5-1.1) p=0.10                                       | 0.9 (0.5-1.6) p=0.74                                         |
| <b>HRT use (ever)</b>                         | 0.6 (0.4-0.8) p<0.01                                       | 0.5 (0.3-0.8) p<0.01                                         |



|                                                    | <b>OR (95% CI), P-value</b><br><b>PSC-IBD vs. Controls</b> | <b>OR (95% CI), P-value</b><br><b>PSC-woIBD vs. Controls</b> |
|----------------------------------------------------|------------------------------------------------------------|--------------------------------------------------------------|
| <b>Freq Steak or Burger (fastfood or panfried)</b> | 1.3 (1.1-1.6) p<0.01                                       | 1.1 (0.9-1.4) p=0.41                                         |
| <b>Freq Steak/Burger (grilled)</b>                 | 0.9 (0.8-0.96) p<0.01                                      | 0.9 (0.8-0.98) p=0.02                                        |
| <b>Steak or Burgers (how well done)</b>            | 1.3 (1.2-1.5) p<.001                                       | 1.2 (1.1-1.4) p<0.01                                         |
| <b>Freq Chicken (fastfood or panfried)</b>         | 1.2 (1.0-1.6) p=0.06                                       | 1.4 (1.01-1.8) p=0.04                                        |
| <b>Freq Chicken (grilled)</b>                      | 0.8 (0.8-0.9) p<.001                                       | 0.9 (0.8-1.3) p=0.11                                         |
| <b>Freq Grilled/Barbequed Meat (C-S-B)</b>         | 0.8 (0.7- 0.9) p<.001                                      | 0.8(0.7-0.97) p=0.02                                         |
| <b>Freq Fastfood/Panfried (C-S-B)</b>              | 1.4(1.1-1.8) p<0.01                                        | 1.3(1.0-1.8) p=0.09                                          |
| <b>Eat Fish (yes/no)</b>                           | 0.4 (0.2-0.6) p<.001                                       | 0.5 (0.3-0.9) p=0.02                                         |
| <b>Freq Fish (any method)</b>                      | 0.4 (0.3-0.6) p<.001                                       | 0.7(0.4-1.2) p=0.26                                          |
| <b>Freq Vegetables</b>                             | 0.9 (0.8-0.9) p<.001                                       | 0.9 (0.9-0.99) p=0.04                                        |
| <b>Freq Fruit</b>                                  | 0.9 (0.8-0.9) p<.001                                       | 1.0 (0.9-1.0) p=0.52                                         |

|                  | <b>OR (95% CI), P-value</b><br><b>PSC-IBD vs. Controls</b> | <b>OR (95% CI), P-value</b><br><b>PSC-woIBD vs. Controls</b> |
|------------------|------------------------------------------------------------|--------------------------------------------------------------|
| <b>Freq Milk</b> | 1.0 (0.9-1.0) p=0.07                                       | 0.9 (0.9- 0.97) p<0.01                                       |

<sup>1</sup>Control values are age- and gender-adjusted to the distribution of the cases. Therefore, the number of subjects is not reported. The P-value is derived from the logistic regression model adjusting for age and gender.

Controls n=652; PSC-IBD n=693; PSC-woIBD n=251

Abbreviations: IBD (inflammatory bowel disease); PSC (primary sclerosing cholangitis); PSC-IBD (PSC with IBD); PSC-woIBD (PSC without IBD); odds ratio (OR); CI (confidence interval); hormone replacement therapy (HRT); years (yrs); urinary tract infections (UTI's);freq (frequency); C-S-B (chicken-steak-burger) .

Supplementary Table 4. Sensitivity Analysis Excluding Patients with Liver Transplant at Time of Questionnaire<sup>1</sup>

|                                               | <b>OR (95% CI), P value</b><br><b>PSC-IBD vs. Controls</b> | <b>OR (95% CI), P value</b><br><b>PSC-wolBD vs. Controls</b> |
|-----------------------------------------------|------------------------------------------------------------|--------------------------------------------------------------|
| <b>Smoked Cigarettes (ever)</b>               | 0.5 (0.4-0.7) p<.001                                       | 1.0 (0.7-1.4) p=0.87                                         |
| <b>Currently Smoke Cigarettes</b>             | 0.4 (0.1-1.3) p=0.12                                       | 1.6 (0.7- 4.0) p=0.27                                        |
| <b>Pack Yrs</b>                               | 0.9 (0.7-1.0) p=0.15                                       | 1.0 (0.8-1.1) p=0.64                                         |
| <b>Appendix Removal</b>                       | 1.7 (1.3- 2.3) p<.001                                      | 1.0 (0.7-1.6) p=0.78                                         |
| <b>Tonsillectomy</b>                          | 0.8 (0.6-1.0) p=0.055                                      | 0.9 (0.7-1.3) p=0.75                                         |
| <b>Tonsillectomy as Child (0-19 Years)</b>    | 0.9 (0.7-1.2) p=0.35                                       | 1.0 (0.7-1.5) p=0.93                                         |
| <b>Recurring UTIs</b>                         | 1.6 (1.02-2.4) p=0.04                                      | 1.8 (1.1-3.1) p=0.02                                         |
| <b>Frequency of Recurring UTIs</b>            | 1.2 (0.8-1.8) p=0.42                                       | 1.0 (0.6-1.7) p=0.89                                         |
| <b>Hormone Based Contraceptive Use (ever)</b> | 0.8 (0.5-1.2) p=0.24                                       | 0.9 (0.5-1.5) p=0.67                                         |
| <b>HRT use (ever)</b>                         | 0.4 (0.3- 0.7) p<.001                                      | 0.5 (0.3-0.8) p<0.01                                         |
| <b>Freq Steak/Burgers (fastfood/panfried)</b> | 1.2 (1.1-1.5) p=0.04                                       | 1.1 (0.9-1.5) p=0.37                                         |

|                                            | <b>OR (95% CI), P value</b><br><b>PSC-IBD vs. Controls</b> | <b>OR (95% CI), P value</b><br><b>PSC-w/oIBD vs. Controls</b> |
|--------------------------------------------|------------------------------------------------------------|---------------------------------------------------------------|
| <b>Freq Steak/Burgers (grilled)</b>        | 0.9 (0.8-0.96) p<0.01                                      | 0.9 (0.8-0.98) p=0.02                                         |
| <b>Steak/Burger (how well done)</b>        | 1.3 (1.1-1.5) p<.001                                       | 1.3 (1.1-1.5) p<0.01                                          |
| <b>Freq Chicken (fastfood/panfried)</b>    | 1.2 (0.9-1.5) p=0.15                                       | 1.3 (1.01-1.8) p<0.01                                         |
| <b>Freq Chicken (grilled)</b>              | 0.8 (0.7-0.9) p<.001                                       | 0.9 (0.8-1.1) p=0.33                                          |
| <b>Freq Grilled/Barbequed Meat (C-S-B)</b> | 0.8 (0.7-0.9) p<.001                                       | 0.9 (0.7-0.99) p=0.049                                        |
| <b>Freq Fastfood/Panfried (C-S-B)</b>      | 1.3 (1.0-1.7) p=0.04                                       | 1.3 (1.0-1.9) p=0.08                                          |
| <b>Eat Fish (yes/no)</b>                   | 0.4 (0.2-0.6) p<.001                                       | 0.5 (0.8-0.9) p=0.02                                          |
| <b>Freq Fish</b>                           | 0.5 (0.3-0.8) p<0.01                                       | 0.8 (0.5-1.4) p=0.46                                          |
| <b>Freq Vegetables</b>                     | 0.9 (0.8-0.95) p<.001                                      | 0.9 (0.8-0.98) p=0.02                                         |
| <b>Freq Fruit</b>                          | 0.9 (0.9-1.0) p=0.051                                      | 1.0 (0.9-1.1) p=0.95                                          |
| <b>Freq Milk</b>                           | 1.0 (0.9-1.0) p=0.08                                       | 0.9 (0.8-0.97) p<0.01                                         |

<sup>1</sup>Control values are age- and gender-adjusted to the distribution of the cases. Therefore, the number of subjects is not reported. The P-value is derived from the logistic regression model adjusting for age and gender.

Controls n=654; PSC-IBD n=565; PSC-wolBD n=205

Abbreviations: IBD (inflammatory bowel disease); PSC (primary sclerosing cholangitis); PSC-IBD (PSC with IBD); PSC-wolBD (PSC without IBD); odds ratio (OR); CI (confidence interval); hormone replacement therapy (HRT); years (yrs); urinary tract infections (UTI's);freq (frequency); C-S-B (chicken-steak-burger).

Supplementary Table 5. Sensitivity Analysis Excluding Patients When Self-Reported Inflammatory Bowel Disease Status Could Not Be Corroborated By Medical Record Review <sup>1</sup>

|                                               | <b>OR (95% CI), P value</b><br><b>PSC-IBD vs. Controls</b> | <b>OR (95% CI), P value</b><br><b>PSC-w/oIBD vs. Controls</b> |
|-----------------------------------------------|------------------------------------------------------------|---------------------------------------------------------------|
| <b>Smoked Cigarettes (ever)</b>               | 0.5 (0.4-0.7) p<.001                                       | 0.9 (0.6-1.2) p=0.45                                          |
| <b>Currently Smoke Cigarettes</b>             | 0.5 (0.2-1.2) p=0.13                                       | 1.4 (0.6- 3.5) p=0.42                                         |
| <b>Pack Yrs</b>                               | 0.8 (0.6-0.9) p<0.01                                       | 1.0 (0.8-1.2) p=0.82                                          |
| <b>Appendix Removal</b>                       | 2.0 (1.5- 2.6) p<.001                                      | 1.2 (0.8-1.7) p=0.45                                          |
| <b>Tonsillectomy</b>                          | 0.9 (0.7-1.1) p=0.27                                       | 1.0 (0.7-1.4) p=0.97                                          |
| <b>Tonsillectomy as Child (0-19 Years)</b>    | 1.0 (0.7-1.3) p=0.91                                       | 1.1 (0.8-1.6) p=0.48                                          |
| <b>Recurring UTIs</b>                         | 1.7 (1.1-2.5) p=0.01                                       | 1.8 (1.1-3.0) p=0.02                                          |
| <b>Frequency of Recurring UTIs</b>            | 1.1 (0.7-1.6) p=0.71                                       | 1.0 (0.6-1.7) p=0.90                                          |
| <b>Hormone Based Contraceptive Use (ever)</b> | 0.7 (0.4-1.0) p=0.05                                       | 0.9 (0.5-1.5) p=0.67                                          |
| <b>HRT use (ever)</b>                         | 0.6 (0.4- 0.9) p=0.02                                      | 0.4 (0.3-0.7) p<0.01                                          |

|                                               | <b>OR (95% CI), P value</b><br><b>PSC-IBD vs. Controls</b> | <b>OR (95% CI), P value</b><br><b>PSC-w/oIBD vs. Controls</b> |
|-----------------------------------------------|------------------------------------------------------------|---------------------------------------------------------------|
| <b>Freq Steak/Burgers (fastfood/panfried)</b> | 1.3 (1.1-1.6) p<0.01                                       | 1.1 (0.9-1.5) p=0.39                                          |
| <b>Freq Steak/Burgers (grilled)</b>           | 0.9 (0.8-0.96) p<0.01                                      | 0.9 (0.8-0.99) p=0.03                                         |
| <b>Steak/Burger (how well done)</b>           | 1.4 (1.3-1.6) p<.001                                       | 1.3 (1.1-1.4) p<0.01                                          |
| <b>Freq Chicken (fastfood/panfried)</b>       | 1.3 (1.0-1.6) p=0.03                                       | 1.3 (1.0-1.7) p=0.07                                          |
| <b>Freq Chicken (grilled)</b>                 | 0.8 (0.7-0.9) p<.001                                       | 0.9 (0.8-1.1) p=0.21                                          |
| <b>Freq Grilled/Barbequed Meat (C-S-B)</b>    | 0.8 (0.7-0.9) p<.001                                       | 0.9 (0.7-0.99) p=0.04                                         |
| <b>Freq Fastfood/Panfried (C-S-B)</b>         | 1.5 (1.1-1.9) p<0.03                                       | 1.3 (0.9-1.8) p=0.12                                          |
| <b>Eat Fish (yes/no)</b>                      | 0.4 (0.3-0.6) p<.001                                       | 0.5 (0.3-0.8) p=0.01                                          |
| <b>Freq Fish</b>                              | 0.4 (0.3-0.6) p<0.01                                       | 0.6 (0.4-1.1) p=0.10                                          |
| <b>Freq Vegetables</b>                        | 0.9 (0.8-0.9) p<.001                                       | 0.9 (0.9-1.01) p=0.08                                         |
| <b>Freq Fruit</b>                             | 0.9 (0.8-0.9) p<0.001                                      | 1.0 (0.9-1.1) p=0.79                                          |

|                  | <b>OR (95% CI), P value</b><br><b>PSC-IBD vs. Controls</b> | <b>OR (95% CI), P value</b><br><b>PSC-woIBD vs. Controls</b> |
|------------------|------------------------------------------------------------|--------------------------------------------------------------|
| <b>Freq Milk</b> | 0.9 (0.9-1.0) p=0.05                                       | 0.9 (0.9-0.98) p=0.01                                        |

<sup>1</sup>Control values are age- and gender-adjusted to the distribution of the cases. Therefore, the number of subjects is not reported. The P-value is derived from the logistic regression model adjusting for age and gender.

Controls n=654; PSC-IBD n=635; PSC-woIBD n=218

Abbreviations: IBD (inflammatory bowel disease); PSC (primary sclerosing cholangitis); PSC-IBD (PSC with IBD); PSC-woIBD (PSC without IBD); odds ratio (OR); CI (confidence interval); hormone replacement therapy (HRT); years (yrs); urinary tract infections (UTI's);freq (frequency); C-S-B (chicken-steak-burger).



Supplementary Table 6. Sensitivity Analysis Including Only Those Cases with Confirmed Ulcerative Colitis Diagnosis <sup>1</sup>

|                                               | <b>OR (95% CI), P value</b><br><b>PSC-UC vs. Controls</b> |
|-----------------------------------------------|-----------------------------------------------------------|
| <b>Smoked Cigarettes (ever)</b>               | 0.5 (0.4-0.7) p<0.01                                      |
| <b>Currently Smoke Cigarettes</b>             | 0.3 (0.1-1.2) p=0.09                                      |
| <b>Pack Yrs</b>                               | 0.7 (0.5-0.8) p<0.01                                      |
| <b>Appendix Removal</b>                       | 2.0 (1.4-2.7) p<0.01                                      |
| <b>Tonsillectomy</b>                          | 0.9 (0.7-1.2) p=0.52                                      |
| <b>Tonsillectomy as Child (0-19 Years)</b>    | 1.1 (0.8-1.5) p=0.63                                      |
| <b>Recurring UTIs</b>                         | 1.8 (1.1-2.8) p=0.01                                      |
| <b>Frequency of Recurring UTIs</b>            | 0.9 (0.6-1.5) p=0.72                                      |
| <b>Hormone Based Contraceptive Use (ever)</b> | 0.7 (0.4-1.1) p=0.13                                      |
| <b>HRT use (ever)</b>                         | 0.6 (0.4-0.9) p=0.02                                      |
| <b>Freq Steak/Burgers (fastfood/panfried)</b> | 1.4 (1.1-1.7) p<0.01                                      |

|                                            | <b>OR (95% CI), P value</b><br><b>PSC-UC vs. Controls</b> |
|--------------------------------------------|-----------------------------------------------------------|
| <b>Freq Steak/Burgers (grilled)</b>        | 0.9 (0.8-0.97) p=0.01                                     |
| <b>Steak/Burger (how well done)</b>        | 1.4 (1.3-1.7) p<0.01                                      |
| <b>Freq Chicken (fastfood/panfried)</b>    | 1.4 (1.1-1.8) p<0.01                                      |
| <b>Freq Chicken (grilled)</b>              | 0.8 (0.7-0.9) p<0.01                                      |
| <b>Freq Grilled/Barbequed Meat (C-S-B)</b> | 0.8 (0.7-0.9) p<0.01                                      |
| <b>Freq Fastfood/Panfried (C-S-B)</b>      | 1.6 (1.2-2.1) p<0.001                                     |
| <b>Eat Fish (yes/no)</b>                   | 0.5 (0.3-0.8) p<0.01                                      |
| <b>Freq Fish</b>                           | 0.5 (0.3-0.8) p<0.01                                      |
| <b>Freq Vegetables</b>                     | 0.9 (0.8-0.9) p<0.01                                      |
| <b>Freq Fruit</b>                          | 0.9 (0.8-0.9) p<0.01                                      |
| <b>Freq Milk</b>                           | 1.0 (0.9-1.0) p=0.33                                      |

<sup>1</sup>Control values are age- and gender-adjusted to the distribution of the cases. Therefore, the number of subjects is not reported. The P-value is derived from the logistic regression model adjusting for age and gender.

Controls n=654; PSC-UC n=517

Abbreviations: UC (ulcerative colitis); PSC (primary sclerosing cholangitis); PSC-UC (PSC with ulcerative colitis); odds ratio (OR); CI (confidence interval); hormone replacement therapy (HRT); years (yrs); urinary tract infections (UTI's);freq (frequency); C-S-B (chicken-steak-burger).
